# Supplementary material for: Simultaneous real-time visible and infrared video with single-pixel detectors
Source: PubMed Central journal article supplement (PMC4650679; doi:10.1038/srep10669), 2015-05-22
Supplement: srep10669-s1.pdf [file srep10669-s1.pdf]

Supplementary Information for

## **Simultaneous real-time visible and infrared video with single-pixel detectors**

Matthew P. Edgar\*, Graham M. Gibson, Richard W. Bowman, Baoqing Sun,

Neal Radwell, Kevin M. Mitchell, Stephen S. Welsh & Miles J. Padgett

Correspondence to: matthew.edgar@glasgow.ac.uk

### **This Supplementary Information includes:**

Captions for videos 1-4

#### **Captions for videos 1-4**

**Video 1:** Video reconstructed in real-time for visible and SWIR wavelengths simultaneously. The visible band is displayed in full-colour (red,green,blue) and SWIR (800 - 1800 nm). Both reconstructions have been fully sampled at 32 x 32 pixel resolution and up-sampled and interpolated to 64 x 64 pixels in real-time with no additional time-lag.

**Video 2:** Video reconstructed in the presence of smoke when operating the camera with 100% sampling, i.e. no compression using the iterative algorithm described in the text. The visible and shortwave infrared video is reconstructed at 64 x 64 pixel resolution and up-sampled and interpolated to 128 x 128 pixels in real-time with no additional time-lag.

**Video 3:** Video reconstructed in the presence of smoke when operating the camera with 50% sampling, using the optimisation algorithm and evolutionary pattern selection described in the text. The visible and shortwave infrared video is reconstructed at 64 x 64 pixel resolution and up-sampled and interpolated to 128 x 128 pixels in real-time with no additional time-lag.

**Video 4:** Video reconstructed in the presence of smoke when operating the camera with 25% sampling, using the optimisation algorithm and evolutionary pattern selection described in the text. The visible and shortwave infrared video is reconstructed at 64 x 64 pixel resolution and up-sampled and interpolated to 128 x 128 pixels in real-time with no additional time-lag.
